# Supplementary material for: Enantiomeric interpenetrating 3D nets with chiral silver helicates
Source: Royal Society of Chemistry journal article supplement (doi:10.1039/b506596h), 2005-01-01
Supplement: b506596h.pdf [file b506596h.pdf]

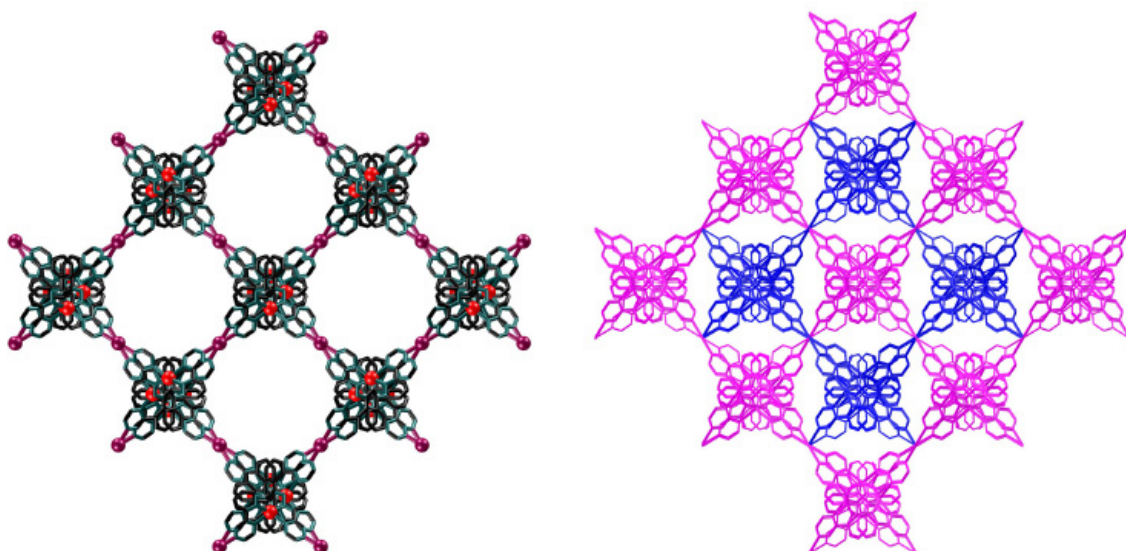

(a)

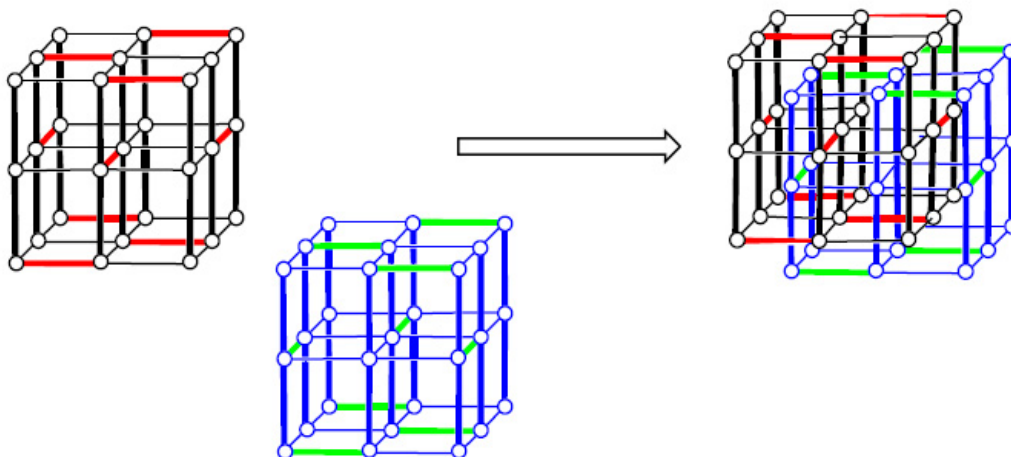

(b)

**S1.** A view of the double interpenetrating nets of enantiomeric forms of the chiral 3D networks. Hydrogen atoms, anions and solvent molecules were omitted for clarity (a); Schematic representation of potential interpenetrating structures resulting from two topologically equivalent 3D nets of enantiomeric networks (b)
